# Supplementary material for: Identification and characterization of the karrikins signaling gene SsSMAX1 in Sapium sebiferum
Source: PeerJ. 2023 Dec 8;11:e16610. doi: 10.7717/peerj.16610 (PMC10712317; doi:10.7717/peerj.16610)
Supplement: Supplemental Information 5 — Hypocotyl length, Root length, Seed germination of SsSMAX1 transgenic lines; overexpression 1 (OE1), 2 (OE2), Atsmxl1, and wild-type (WT) [file peerj-11-16610-s005.xlsx]

## Sheet: Sheet1
Figure 3 data
Genotype	Hypocotyl length (cm)	Root length (cm)		Genotype	Seed Germination (%)
WT	0.305	2.2		WT	92
WT	0.352843	2.67843		WT	96
WT	0.257157	1.72157		WT	88
WT	0.349315	2.65165		WT	95
WT	0.254585	1.70435		WT	89
WT	0.30805	2.222		OE1	86
WT	0.31113	2.24422		OE1	85
WT	0.335201	2.54451		OE1	89
WT	0.244299	1.63549		OE1	81
WT	0.331849	2.51907		OE1	88
WT	0.241856	1.61913		OE2	88
WT	0.32025	2.31		OE2	83
WT	0.267443	1.79043		OE2	84
WT	0.306037	2.20748		OE2	84
WT	0.344425	2.61453		OE2	83
WT	0.317559	2.41059		Atsmax1	100
OE1	0.456333	2.1		Atsmax1	100
OE1	0.480005	2.33671		Atsmax1	100
OE1	0.432662	1.86329		Atsmax1	99
OE1	0.475205	2.31335		Atsmax1	99
OE1	0.428335	1.84465
OE1	0.460897	2.121
OE1	0.465506	2.14221
OE1	0.456004	2.21988
OE1	0.411029	1.77012
OE1	0.451444	2.19768
OE1	0.406919	1.75242
OE1	0.47915	2.205
OE1	0.449968	1.93782
OE1	0.457885	2.10714
OE1	0.468552	2.28096
OE1	0.432004	2.10304
OE2	0.209	2.2
OE2	0.273861	2.56714
OE2	0.144139	1.83286
OE2	0.271123	2.54146
OE2	0.142697	1.81454
OE2	0.21109	2.222
OE2	0.213201	2.24422
OE2	0.260168	2.43878
OE2	0.136932	1.74122
OE2	0.257567	2.41439
OE2	0.135562	1.72381
OE2	0.21945	2.31
OE2	0.149904	1.90618
OE2	0.209711	2.20748
OE2	0.267327	2.50588
OE2	0.246475	2.31042
Atsmax1	0.426333	3.4
Atsmax1	0.450005	3.76486
Atsmax1	0.402662	3.03514
Atsmax1	0.445505	3.72721
Atsmax1	0.398635	3.00479
Atsmax1	0.430597	3.434
Atsmax1	0.434903	3.46834
Atsmax1	0.427504	3.57662
Atsmax1	0.382529	2.88338
Atsmax1	0.423229	3.54085
Atsmax1	0.378704	2.85455
Atsmax1	0.44765	3.57
Atsmax1	0.418768	3.15654
Atsmax1	0.427783	3.41156
Atsmax1	0.439268	3.67503
Atsmax1	0.405004	3.38838
