# Supplementary material for: Identification and characterization of the karrikins signaling gene SsSMAX1 in Sapium sebiferum
Source: PeerJ. 2023 Dec 8;11:e16610. doi: 10.7717/peerj.16610 (PMC10712317; doi:10.7717/peerj.16610)
Supplement: Supplemental Information 6 — Expression levels in wild-type and SsSMAX1 transgenic line 1 and line 2 (OE1 and OE2 respectively). Leaves of 15-day-old seedlings of wild-type (WT), AtSMAX1, and SsSMAX1 transgenic Arabidopsis line 1(OE1) and 2 (OE2) were collected from gene expression analysis. [file peerj-11-16610-s006.xlsx]

## Sheet: Sheet1
Genotype	SsSMAX1	AtSMAX1
WT	0	4.9
WT	0	6.1
WT	0	3.7
OE1	25.3	6.4
OE1	30.7	7.8
OE1	19.9	5
OE2	19.5	4.9
OE2	25.9	7.3
OE2	22.7	6.1
