# Supplementary material for: Identification and characterization of the karrikins signaling gene SsSMAX1 in Sapium sebiferum
Source: PeerJ. 2023 Dec 8;11:e16610. doi: 10.7717/peerj.16610 (PMC10712317; doi:10.7717/peerj.16610)
Supplement: Supplemental Information 7 — Leaf length, Leaf width, and Petiol length of SsSMAX1 transgenic lines; overexpression 1 (OE1), 2 (OE2), Atsmxl1, and wild-type (WT) [file peerj-11-16610-s007.xlsx]

## Sheet: Sheet1
Figure 5 data
Genotype	Leaf length (cm)	Petiol length (cm)	Leaf width (cm)
WT	3.975	2.08	1.45
WT	4.21849	2.34957	1.56952
WT	3.73151	1.81043	1.33048
WT	4.1763	2.32607	1.55383
WT	3.6942	1.79233	1.31717
WT	4.01475	2.1008	1.4645
WT	4.0549	2.12181	1.47914
WT	4.00756	2.23209	1.49105
WT	3.54494	1.71991	1.26395
WT	3.96749	2.20977	1.47614
WT	3.50949	1.70271	1.25131
WT	4.17375	2.184	1.5225
WT	3.88077	1.88285	1.3837
WT	3.98852	2.08707	1.45493
WT	4.11783	2.29351	1.53207
WT	3.79664	2.11461	1.41257
OE1	5.46667	3.55	1.35
OE1	5.60329	3.79	1.49142
OE1	5.33004	3.31	1.20858
OE1	5.54726	3.7521	1.47651
OE1	5.27674	3.2769	1.19649
OE1	5.52133	3.5855	1.3635
OE1	5.57655	3.62135	1.37714
OE1	5.32313	3.6005	1.41685
OE1	5.06354	3.1445	1.14815
OE1	5.2699	3.56449	1.40268
OE1	5.0129	3.11305	1.13667
OE1	5.74	3.7275	1.4175
OE1	5.54324	3.4424	1.25692
OE1	5.48525	3.56207	1.35459
OE1	5.4696	3.69957	1.45584
OE1	5.04296	3.411	1.34228
OE2	5.1	3.61	1.45
OE2	5.23663	3.91	1.59142
OE2	4.96337	3.31	1.30858
OE2	5.18426	3.8709	1.57551
OE2	4.91374	3.2769	1.29549
OE2	5.151	3.6461	1.4645
OE2	5.20251	3.68256	1.47914
OE2	4.97479	3.7145	1.51185
OE2	4.71521	3.1445	1.24315
OE2	4.92505	3.67735	1.49673
OE2	4.66805	3.11305	1.23072
OE2	5.355	3.7905	1.5225
OE2	5.16191	3.4424	1.36092
OE2	5.11734	3.62227	1.45493
OE2	5.11168	3.81671	1.55345
OE2	4.71296	3.519	1.43228
Atsmax1	2.07143	0.5	1.65714
Atsmax1	2.47024	0.63	1.75473
Atsmax1	1.67262	0.37	1.55955
Atsmax1	2.44553	0.6237	1.73719
Atsmax1	1.65589	0.3663	1.54396
Atsmax1	2.09214	0.505	1.67371
Atsmax1	2.11306	0.51005	1.69045
Atsmax1	2.34672	0.5985	1.667
Atsmax1	1.58899	0.3515	1.48158
Atsmax1	2.32326	0.592515	1.65033
Atsmax1	1.5731	0.347985	1.46676
Atsmax1	2.175	0.525	1.74
Atsmax1	1.73953	0.3848	1.62193
Atsmax1	2.07847	0.5017	1.66278
Atsmax1	2.4113	0.614968	1.71286
Atsmax1	2.22321	0.567	1.57926
